# Supplementary material for: Genomic Convergence among ERRα, PROX1, and BMAL1 in the Control of Metabolic Clock Outputs
Source: PubMed Central journal article supplement (PMC3121748; doi:10.1371/journal.pgen.1002143), 2011-06-23

**Figure S1**

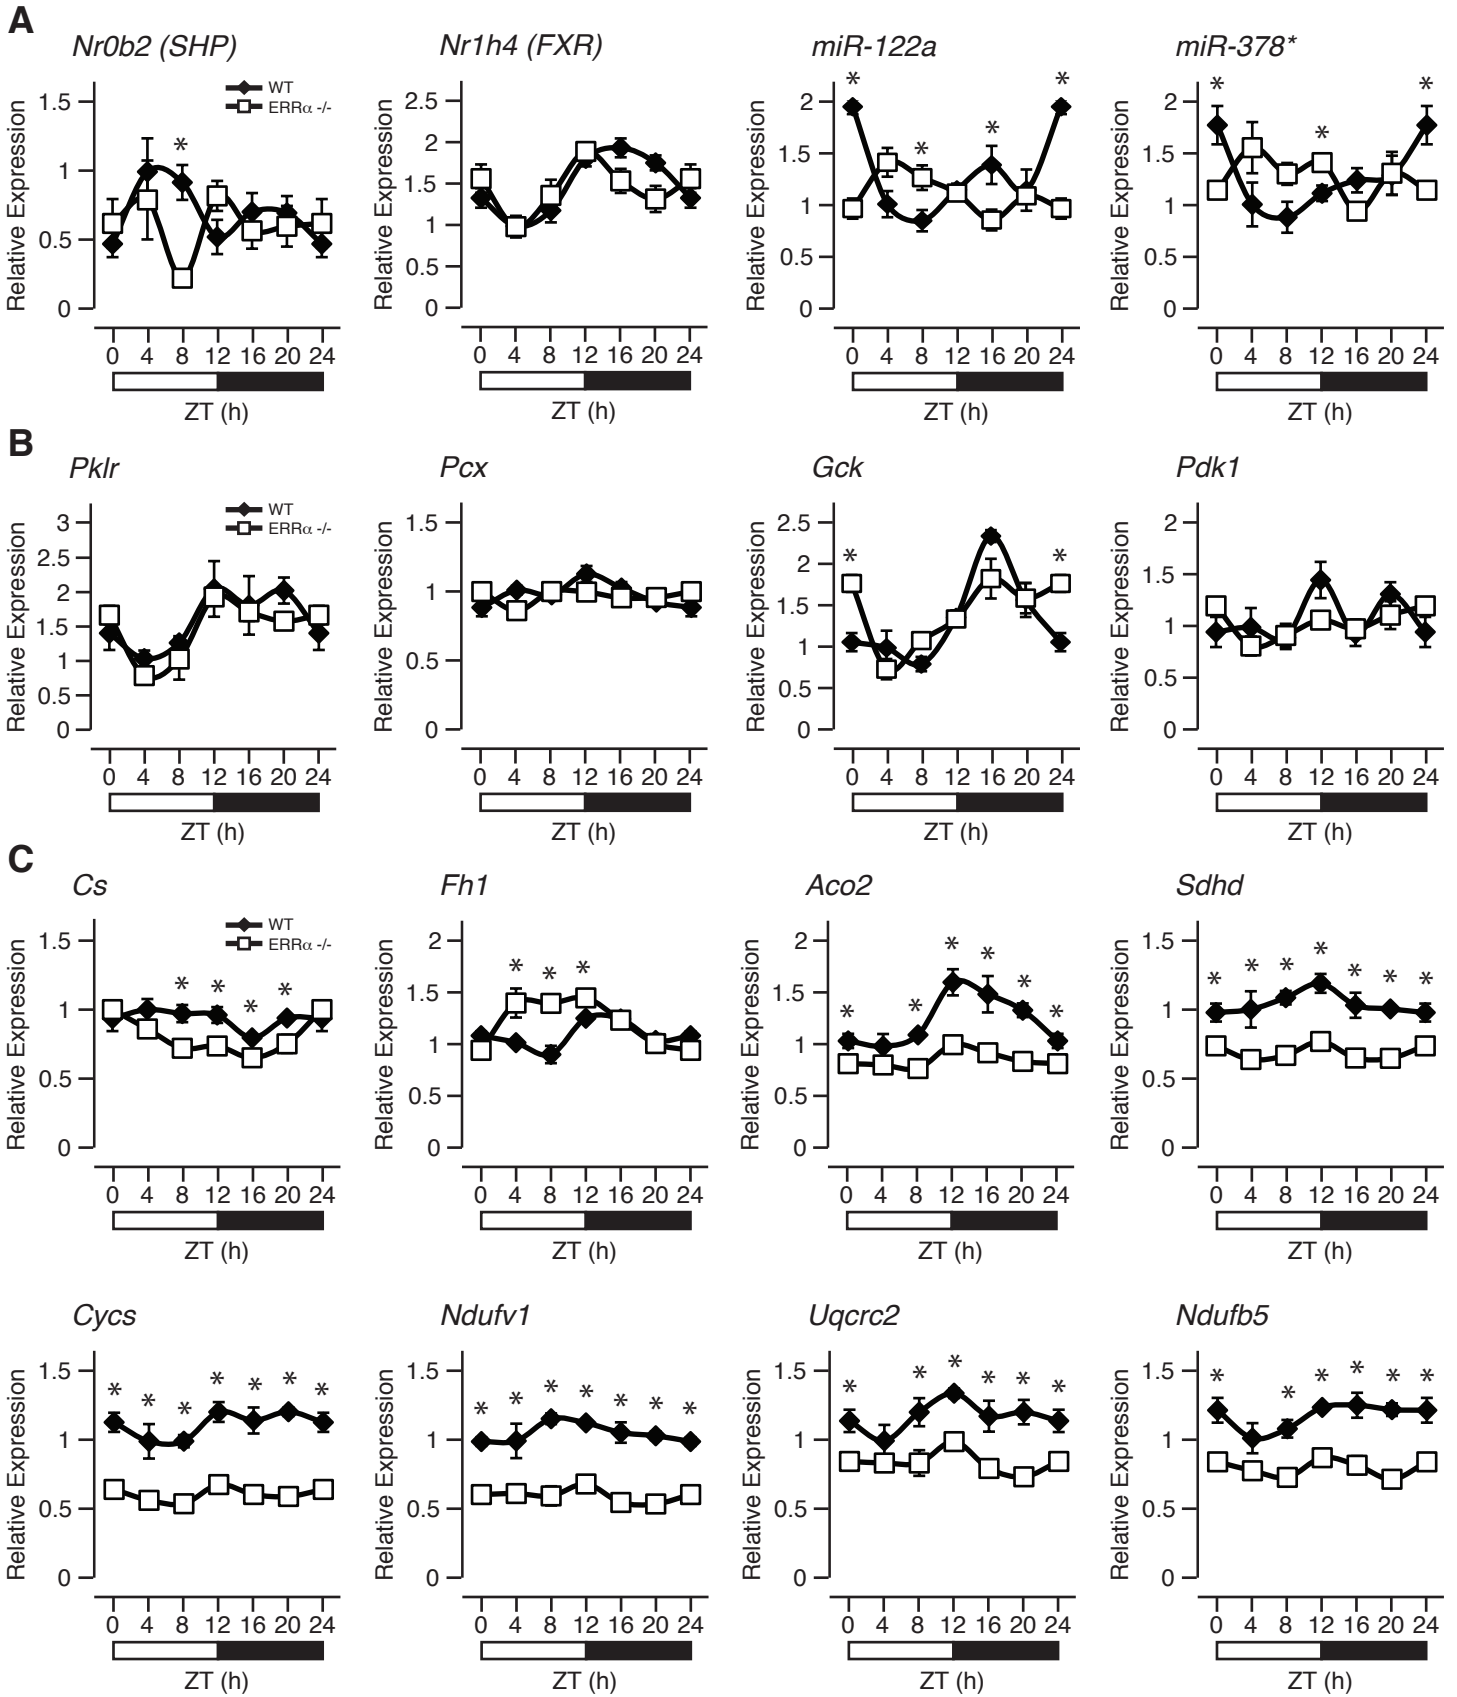

Supplement: pgen.1002143.s001.pdf [file pgen.1002143.s001.pdf]
