# Supplementary material for: Genomic Convergence among ERRα, PROX1, and BMAL1 in the Control of Metabolic Clock Outputs
Source: PubMed Central journal article supplement (PMC3121748; doi:10.1371/journal.pgen.1002143), 2011-06-23
Supplement: pgen.1002143.s011.pdf [file pgen.1002143.s011.pdf]

## Supplemental table 6

Mouse primers used for qRT-PCR.

| GENE           | PRIMER                                                                                  |
|----------------|-----------------------------------------------------------------------------------------|
| <i>Abcb11</i>  | forward 5'-GAGTACACACCAGGGACACTGATCCAG-3'<br>reverse 5'-GCTTGTAACCATCTCCTGACATGCAGTC-3' |
| <i>Acacb</i>   | forward 5'-GGGCTCCCTGGATGACAACTC-3'<br>reverse 5'-GACGGTGAAATCTCTGTGCAGG-3'             |
| <i>Acadm</i>   | forward 5'-GGGGAGGATGACGGAGCAGC-3'<br>reverse 5'-CGGGTACTTTAGGATCTGGG-3'                |
| <i>Aco2</i>    | forward 5'-CTTTCGACAAGTGGGACGGCAAAGAC-3'<br>reverse 5'-GACAGCATTGCGTACAGAGTTGGC-3'      |
| <i>Arbp</i>    | forward 5'-GCAGCAGATCCGCATGTCGCTCCG-3'<br>reverse 5'-GAGCTGGCACAGTGACCTCACACGG-3'       |
| <i>Bmal1</i>   | forward 5'-CTCACCGTGCTAAGGATGGCTGTTC-3'<br>reverse 5'-GACTCGGAGACAAAGAGGATCTTCCC-3'     |
| <i>Clock</i>   | forward 5'-GGGCACCACCAATAATAGGCTATTTGC-3'<br>reverse 5'-GAGTCTGAAGCCATATCCACTGCTG-3'    |
| <i>Cry1</i>    | forward 5'-GACACCATCCGCTGCGTCTATATC-3'<br>reverse 5'-CTTGAAAAGCCTGGGAAATACATCAG-3'      |
| <i>Cs</i>      | forward 5'-CCCTGAGTGCCAGAAAATGCTG-3'<br>reverse 5'-CCACATGAGAAGGCAGAGCTGC-3'            |
| <i>Cycs</i>    | forward 5'-CCAAATCTCCACGGTCTGTTCG-3'<br>reverse 5'-GTATCCTCTCCCAGGTGATGC-3'             |
| <i>Cyp7a1</i>  | forward 5'-CACAAACTCCCTGTCATACCACAAAGTC-3'<br>reverse 5'-GTGAACACAGAGCATCTCCCTGGAGG-3'  |
| <i>Cyp8b1</i>  | forward 5'-CCAGTACTTCACCTTTGTCATGGAC-3'<br>reverse 5'-GTACCCAAACACCTTGAGCACCAGTTC-3'    |
| <i>Cyp27a1</i> | forward 5'-GAAGGACCACCGAGACCACAAGG-3'<br>reverse 5'-CGTTTAAGGCATCCGTGTAGAGCG-3'         |
| <i>Dbp</i>     | forward 5'-GCAAGGAAAGTCCAGGTGCCTGAG-3'<br>reverse 5'-CACCACCTCCTGCCGCAACAG-3'           |

*Dhcr7* forward 5'-GACTTCTGCCACAGATTTCTGCCAGG-3'  
reverse 5'-GGGTAATGAGCCAGGCTTGCAGC-3'

*Esrra* forward 5'-CTCAGCTCTCTACCCAAACGC-3'  
reverse 5'-CCGCTTGGTGATCTCACACTC-3'

*Esrrg* forward 5'-CTCCAGCACCATCGTAGAGGATC-3'  
reverse 5'-GATCTCACATTCATTCGTGGCTG-3'

*Fh1* forward 5'-GCAGTGGAAGTTCACAAGGTCCTG-3'  
reverse 5'-CTGGACTTGCTGAACGTAACCAC-3'

*G6pc* forward 5'-GCTCACTTTCCCCACCAGGTCG-3'  
reverse 5'-CACCCCTAGCCCTTTTAGTAGCAGGTAG-3'

*Gck* forward 5'-GCCACAATGATCTCCTGCTACTATGAAG-3'  
reverse 5'-CACCAGCTCCACATTCTGCATC-3'

*Glut2* forward 5'-GCCATCAACATGATCTTCACGGCTG-3'  
reverse 5'-CAGTCATGCTCACGTAACTCATCCAGG-3'

*Gys1* forward 5'-CGGTTGTCCGACTTGCTAGATTGG-3'  
reverse 5'-CATAGGTGAAGTGGTCTGGAAAGGC-3'

*Gys2* forward 5'-CCTTGGGGTGTTTCCATCGTAC-3'  
reverse 5'-CGGAGAGGTTTGTAGTCACACTGG-3'

*Hmgcr* forward 5'-GCTCTTGTGGAATGCCTTGTGATTG-3'  
reverse 5'-CTCTAGGACCAGCGACACACAGG-3'

*HSD3B7* forward 5'-GACCATCCACAAAGTCAACGTGC-3'  
reverse 5'-GCCTCATATGGGGTATCTTCATTGCC-3'

*Insr* forward 5'-GCTGATGGCATGGCATACTTGAAC-3'  
reverse 5'-CCTCACAGGAAGCAGTCCCTTG-3'

*Lipe* forward 5'-GACCTCCGACTGGGTGCCTC-3'  
reverse 5'-GCTGCCTCAGACACACTCCTGC-3'

*Lipc* forward 5'-CTGCCACTTCCTGGAACTCTACAAACAC-3'  
reverse 5'-GCTGCCCATGTCGCTGCACTG-3'

*Mlycd* forward 5'-CCGACTGAAACCGAGGAGAGG-3'  
reverse 5'-CAGCAGCCACTTGGTGAATCC-3'

*Ndufb5* forward 5'-CGAGCTTGCAGAAATCCCAGAAGGC-3'  
reverse 5'-GTCCATCACCTCGGGCACGCATCAG-3'

*Ndufv1* forward 5'-GCTAATGGACTTCGATGCACTGG-3'  
reverse 5'-CACAGCTCTCATGCTTGTAGAACTCAATG-3'

*Nr0b2 (Shp)* forward 5'-CCAGGGTGCCCAGCCATCAG-3'  
reverse 5'-CCCAGTGAGCCTCCTGTTGCAG-3'

*Nr1h4 (Fxr)* forward 5'-GGAGTGGTAGCCAAGATGAATCTGATTG-3'  
reverse 5'-GGAAACGGGACATTGTTGTATGGG-3'

*Pck1* forward 5'-CCAGGCAGTGAGGAAGTTCG-3'  
reverse 5'-GAGGGTCAGTGAGAGCCAGC-3'

*Pcx* forward 5'-GGTGTTCCTTTGAACTCAATGGGCAGC-3'  
reverse 5'-CCTTGGTAACATGAACCTTTCGGATAGTG-3'

*Pdha1* forward 5'-GCCGAGTGCTGGTTGCTTCCC-3'  
reverse 5'-GTCTGCATCATCCTGTAGTACTTGAGCC-3'

*Pdk1* forward 5'-GTGTTGAAACGTCCCGTGCTG-3'  
reverse 5'-GCTTCCAGGCGGCTTTATTGT-3'

*Pdk4* forward 5'-GATCCTAACCACCGCCAGCC-3'  
reverse 5'-GCAAAGGACGTTCTTTCACAG-3'

*Pik3c2g* forward 5'-CCCTGAATGAAGAGCTTTCCAAGGAG-3'  
reverse 5'-GGGTTTCAGAGGAAGATGGCAAGTC-3'

*Pik3r1* forward 5'-CCCCTACTGTAGCCAACAACAGC-3'  
reverse 5'-GAGTGTAATCGCCGTGCATTTTAG-3'

*Pklr* forward 5'-GAGTCTTCCCCTTGCTCTACCGTGAG-3'  
reverse 5'-GTATAGCCAGAGCCAGGTCGCCAG-3'

*Ppargc1a* forward 5'-CAGTCCTTCCTCCATGCCTG-3'  
reverse 5'-GGGTTTGTCTGATCCTGTGG-3'

*Ppargc1b* forward 5'-CAGCCAGTACAGCCCCGATG-3'  
reverse 5'-GGTGTGTCGCCTTCATCCAG-3'

*Prkag2* forward 5'-CAGAAAGTGGCGTTTATATGCGATTTC-3'  
reverse 5'-GGCTACCAAGGCAAAGAAGGC-3'

*Prox1* forward 5'-CAGCACACCCACCCAGCACCG-3'

reverse 5'-CACGTCCGAGAAGTAGGTCTTCAG-3'

*Reverba* forward 5'-CTCACTCGTCTCCCTCAGCCATTG-3'  
reverse 5'-GGAGCCACTAGAGCCAATGTAGGTG-3'

*Sdhd* forward 5'-GGTACTTGAATCCCTGCTCTGTGGTG-3'  
reverse 5'-GTCCCCATGAACGTAGTCGGTAACC-3'

*Slc10a1* forward 5'-GCCACACTATGTACCCTACGTCCTC-3'  
reverse 5'-GAATGTAGCCCATCAGGAAGCCAGTG-3'

*Stk11 (Lkb1)* forward 5'-GCAAGGTGAAGGAGGTGCTG-3'  
reverse 5'-GCTGGATCACATTCCGATGC-3'

*Uqcrc2* forward 5'-GCCACCTTCTACCGTCCTTCAACAGATTG-3'  
reverse 5'-CGTATGTCCCAAGTTTCCACTCGCTGC-3'
